# Supplementary material for: Effects of Industrial Processing on Pesticide Multiresidues Transfer from Raw Tomatoes to Processed Products
Source: PubMed Central journal article supplement (PMC7588992; doi:10.3390/foods9101497), 2020-10-19
Supplement: foods-09-01497-s001.pdf [file foods-09-01497-s001.pdf]

**Table S1.** Active ingredients, types, and LC-MS/MS-MRM m/z ions used for qualitative and quantitative analysis.

|    | <b>Pesticide</b>  | <b>Type of pesticide<sup>y</sup></b> | <b>tr (min)</b> | <b>Precursor ion (m/z)</b> | <b>Product ions (m/z)</b> |
|----|-------------------|--------------------------------------|-----------------|----------------------------|---------------------------|
| 1  | Cyromazine*       | IGR                                  | 2.86            | 167                        | 68                        |
|    |                   |                                      |                 |                            | 85                        |
| 2  | Methamidophos     | I                                    | 2.89            | 142                        | 94                        |
|    |                   |                                      |                 |                            | 125                       |
| 3  | Acephate          | I                                    | 3.47            | 184                        | 125                       |
|    |                   |                                      |                 |                            | 143                       |
| 4  | Formetanate*      | I/A                                  | 3.63            | 222                        | 65                        |
|    |                   |                                      |                 |                            | 165                       |
| 5  | Pymetrozine*      | I                                    | 3.84            | 218                        | 79                        |
|    |                   |                                      |                 |                            | 105                       |
| 6  | Omethoate         | I                                    | 3.84            | 214                        | 109                       |
|    |                   |                                      |                 |                            | 125                       |
| 7  | Propamocarb*      | F                                    | 3.87            | 189                        | 102                       |
|    |                   |                                      |                 |                            | 74                        |
| 8  | Oxamyl*           | N                                    | 4.45            | 237                        | 72                        |
|    |                   |                                      |                 |                            | 90                        |
| 9  | Methomyl*         | I                                    | 4.77            | 163                        | 88                        |
|    |                   |                                      |                 |                            | 106                       |
| 10 | Flonicamid*       | I                                    | 4.81            | 230                        | 174                       |
|    |                   |                                      |                 |                            | 203                       |
| 11 | Thiamethoxam*     | I                                    | 4.90            | 292                        | 181                       |
|    |                   |                                      |                 |                            | 211                       |
| 12 | Carbendazim       | F                                    | 5.00            | 192                        | 132                       |
|    |                   |                                      |                 |                            | 160                       |
| 13 | Monocrotophos     | I                                    | 5.06            | 224                        | 127                       |
|    |                   |                                      |                 |                            | 193                       |
| 14 | Chlordimeform     | A                                    | 5.15            | 197                        | 117                       |
|    |                   |                                      |                 |                            | 152                       |
| 15 | Cypermethrin*     | I                                    | 5.52            | 433                        | 89                        |
|    |                   |                                      |                 |                            | 133                       |
| 16 | Imidacloprid*     | I                                    | 5.55            | 256                        | 128                       |
|    |                   |                                      |                 |                            | 175                       |
| 17 | Methiocarb*       | I                                    | 5.77            | 242                        | 170                       |
|    |                   |                                      |                 |                            | 185                       |
| 18 | Dimethoate*       | I                                    | 6.04            | 230                        | 79                        |
|    |                   |                                      |                 |                            | 125                       |
| 19 | Acetamiprid*      | I                                    | 6.05            | 223                        | 56                        |
|    |                   |                                      |                 |                            | 126                       |
| 20 | Cymoxanil*        | F                                    | 6.51            | 199                        | 110                       |
|    |                   |                                      |                 |                            | 128                       |
| 21 | Thiacloprid*      | I                                    | 6.64            | 253                        | 90                        |
|    |                   |                                      |                 |                            | 126                       |
| 22 | Atrazine-desethyl | H                                    | 6.68            | 188                        | 68                        |
|    |                   |                                      |                 |                            | 146                       |
| 23 | Aldicarb          | I                                    | 7.30            | 213                        | 89                        |
|    |                   |                                      |                 |                            | 116                       |

|    |                      |   |       |     |     |
|----|----------------------|---|-------|-----|-----|
| 24 | Pirimicarb*          | I | 8.05  | 239 | 72  |
|    |                      |   |       |     | 182 |
| 25 | Dichlorvos           | I | 8.27  | 221 | 109 |
|    |                      |   |       |     | 127 |
| 26 | Thiophanate-methyl*  | F | 8.40  | 343 | 93  |
|    |                      |   |       |     | 151 |
| 27 | Metribuzin*          | H | 8.51  | 215 | 84  |
|    |                      |   |       |     | 187 |
| 28 | Carbofuran           | I | 8.58  | 222 | 123 |
|    |                      |   |       |     | 165 |
| 29 | Carbaryl             | I | 9.06  | 202 | 127 |
|    |                      |   |       |     | 145 |
| 30 | Imazalil*            | F | 9.54  | 297 | 159 |
|    |                      |   |       |     | 201 |
| 31 | Fosthiazate*         | N | 9.60  | 284 | 61  |
|    |                      |   |       |     | 227 |
| 32 | Disulfoton-Sulfoxide | I | 9.73  | 291 | 157 |
|    |                      |   |       |     | 185 |
| 33 | Flutriafol*          | F | 10.49 | 302 | 95  |
| 34 | Metalaxyl*           | F | 10.59 | 280 | 160 |
|    |                      |   |       |     | 220 |
| 35 | Methidathion         | I | 10.71 | 303 | 145 |
| 36 | Azinphos-methyl      | I | 10.95 | 318 | 132 |
|    |                      |   |       |     | 261 |
| 37 | Chlorantraniliprole* | I | 11.00 | 483 | 285 |
|    |                      |   |       |     | 453 |
| 38 | Pyrimethanil*        | F | 11.01 | 200 | 82  |
|    |                      |   |       |     | 107 |
| 39 | Azoxystrobin*        | F | 11.44 | 404 | 226 |
|    |                      |   |       |     | 329 |
| 40 | Diethofencarb        | F | 11.45 | 268 | 124 |
|    |                      |   |       |     | 226 |
| 41 | Propanil             | H | 11.61 | 218 | 127 |
|    |                      |   |       |     | 162 |
| 42 | Fenamidone*          | F | 11.68 | 312 | 92  |
|    |                      |   |       |     | 236 |
| 43 | Diclobutrazol        | F | 11.69 | 328 | 70  |
|    |                      |   |       |     | 159 |
| 44 | Boscalid*            | F | 11.86 | 343 | 272 |
|    |                      |   |       |     | 307 |
| 45 | Dimethomorph*        | F | 12.13 | 388 | 165 |
|    |                      |   |       |     | 301 |
| 46 | Mandipropamid*       | F | 12.16 | 412 | 328 |
|    |                      |   |       |     | 356 |
| 47 | Benthiavalicarb*     | F | 12.24 | 340 | 72  |
|    |                      |   |       |     | 180 |
| 48 | Molinate             | H | 12.33 | 188 | 83  |
|    |                      |   |       |     | 126 |
| 49 | Chloroxuron          | H | 12.45 | 291 | 125 |
|    |                      |   |       |     | 164 |

|    |                  |     |       |     |     |
|----|------------------|-----|-------|-----|-----|
| 50 | Myclobutanil*    | F   | 12.48 | 289 | 70  |
|    |                  |     |       |     | 125 |
| 51 | Bifenazate*      | A   | 12.49 | 301 | 170 |
|    |                  |     |       |     | 198 |
| 52 | Cyproconazole* 1 | F   | 12.58 | 292 | 70  |
|    |                  |     |       |     | 125 |
| 53 | Triadimenol*     | F   | 12.64 | 296 | 70  |
|    |                  |     |       |     | 99  |
| 54 | Iprovalicarb*    | F   | 12.70 | 321 | 119 |
|    |                  |     |       |     | 186 |
| 55 | Fenhexamid*      | F   | 12.74 | 302 | 55  |
|    |                  |     |       |     | 97  |
| 56 | Azinphos-ethyl   | I   | 12.76 | 346 | 132 |
|    |                  |     |       |     | 55  |
| 57 | Tetraconazole*   | F   | 12.77 | 372 | 159 |
|    |                  |     |       |     | 108 |
| 58 | Cyproconazole* 2 | F   | 12.78 | 292 | 70  |
|    |                  |     |       |     | 125 |
| 59 | Mepanipyrim*     | F   | 12.80 | 224 | 77  |
|    |                  |     |       |     | 106 |
| 60 | Spirotetramat*   | I   | 12.80 | 374 | 270 |
|    |                  |     |       |     | 302 |
| 61 | Flufenacet*      | H   | 12.81 | 224 | 152 |
|    |                  |     |       |     | 194 |
| 62 | Ethoprop*        | I/N | 12.91 | 243 | 97  |
|    |                  |     |       |     | 131 |
| 63 | Bupirimate*      | F   | 12.93 | 317 | 166 |
| 64 | Cyazofamid*      | F   | 12.97 | 325 | 108 |
|    |                  |     |       |     | 217 |
| 65 | Flusilazole      | F   | 13.24 | 316 | 165 |
|    |                  |     |       |     | 247 |
| 66 | Cyprodinil*      | F   | 13.27 | 226 | 65  |
|    |                  |     |       |     | 77  |
| 67 | Fenamiphos*      | I   | 13.27 | 304 | 217 |
|    |                  |     |       |     | 234 |
| 68 | Iprodione*       | F   | 13.41 | 330 | 245 |
| 69 | Aclonifen*       | H   | 13.51 | 265 | 182 |
|    |                  |     |       |     | 218 |
| 70 | Penconazole*     | F   | 13.65 | 284 | 70  |
|    |                  |     |       |     | 159 |
| 71 | Tebuconazole*    | F   | 13.76 | 308 | 70  |
|    |                  |     |       |     | 125 |
| 72 | Napropamide*     | H   | 13.82 | 272 | 58  |
|    |                  |     |       |     | 171 |
| 73 | Benalaxyl*       | F   | 13.96 | 326 | 91  |
|    |                  |     |       |     | 148 |
| 74 | Spinosyn *A      | I   | 14.14 | 732 | 98  |
|    |                  |     |       |     | 142 |
| 75 | Zoxamide*        | F   | 14.17 | 336 | 159 |
|    |                  |     |       |     | 187 |
| 76 | Pyraclostrobin*  | F   | 14.18 | 388 | 163 |

|     |                      |     |       |     |     |
|-----|----------------------|-----|-------|-----|-----|
|     |                      |     |       |     | 194 |
| 77  | Cyflufenamid         | F   | 14.24 | 413 | 241 |
|     |                      |     |       |     | 295 |
| 78  | Bitertanol           | F   | 14.27 | 338 | 70  |
|     |                      |     |       |     | 100 |
| 79  | Clofentezine*        | A   | 14.28 | 303 | 102 |
|     |                      |     |       |     | 138 |
| 80  | Phosalone            | I/A | 14.29 | 368 | 111 |
|     |                      |     |       |     | 182 |
| 81  | Metrafenone*         | F   | 14.46 | 409 | 209 |
|     |                      |     |       |     | 227 |
| 82  | Difenconazole*       | F   | 14.58 | 406 | 251 |
|     |                      |     |       |     | 337 |
| 83  | Chlorpyrifos-methyl* | I   | 14.63 | 322 | 125 |
|     |                      |     |       |     | 290 |
| 84  | Ametoctradin*        | F   | 14.69 | 276 | 186 |
|     |                      |     |       |     | 191 |
| 85  | Spinosyn* D          | I   | 14.71 | 746 | 98  |
|     |                      |     |       |     | 142 |
| 86  | Indoxacarb*          | I   | 14.73 | 528 | 150 |
|     |                      |     |       |     | 203 |
| 87  | Cycloate             | H   | 14.78 | 216 | 83  |
|     |                      |     |       |     | 154 |
| 88  | Hexaflumuron         | IGR | 14.81 | 461 | 141 |
|     |                      |     |       |     | 158 |
| 89  | Trifloxystrobin*     | F   | 14.82 | 409 | 150 |
|     |                      |     |       |     | 186 |
| 90  | Quizalofop-ethyl*    | H   | 15.32 | 373 | 255 |
|     |                      |     |       |     | 271 |
| 91  | Cycloxydim*          | H   | 15.37 | 326 | 101 |
|     |                      |     |       |     | 180 |
| 92  | Buprofezin*          | I   | 15.54 | 306 | 106 |
|     |                      |     |       |     | 201 |
| 93  | Tebufenpyrad*        | I/A | 15.55 | 334 | 117 |
|     |                      |     |       |     | 145 |
| 94  | Emamectin Benzoate*  | I   | 15.59 | 887 | 126 |
|     |                      |     |       |     | 158 |
| 95  | Propaquizafop*       | H   | 15.61 | 444 | 299 |
|     |                      |     |       |     | 327 |
| 96  | Metaflumizone*       | I   | 15.63 | 507 | 116 |
|     |                      |     |       |     | 178 |
| 97  | Oxadiazon*           | H   | 15.73 | 362 | 220 |
| 98  | Allethrin            | I   | 15.77 | 303 | 103 |
|     |                      |     |       |     | 135 |
| 99  | Piperonyl butoxide*  | S   | 15.83 | 356 | 119 |
|     |                      |     |       |     | 177 |
| 100 | Chlorpyrifos*        | I   | 16.03 | 350 | 97  |
|     |                      |     |       |     | 198 |
| 101 | Hexythiazox*         | I/A | 16.07 | 353 | 168 |
|     |                      |     |       |     | 228 |

|     |                   |     |       |     |     |
|-----|-------------------|-----|-------|-----|-----|
| 102 | Pyriproxyfen*     | I   | 16.12 | 322 | 96  |
|     |                   |     |       |     | 185 |
| 103 | Pendimethalin*    | H   | 16.13 | 282 | 194 |
|     |                   |     |       |     | 212 |
| 104 | Flufenoxuron      | I   | 16.21 | 489 | 141 |
|     |                   |     |       |     | 158 |
| 105 | Propargite        | A   | 16.35 | 368 | 81  |
|     |                   |     |       |     | 231 |
| 106 | Lufenuron*        | I   | 16.53 | 510 | 141 |
|     |                   |     |       |     | 158 |
| 107 | Etoxazole*        | A   | 16.54 | 160 | 113 |
|     |                   |     |       |     | 141 |
| 108 | Fenpyroximate(E)* | A   | 16.66 | 422 | 107 |
|     |                   |     |       |     | 366 |
| 109 | Deltamethrin*     | I/A | 16.85 | 523 | 181 |
|     |                   |     |       |     | 281 |
| 110 | Acrinathrin*      | I/A | 16.92 | 559 | 181 |
|     |                   |     |       |     | 208 |
| 111 | Pyridaben*        | I/A | 17.09 | 365 | 147 |
|     |                   |     |       |     | 309 |
| 112 | Tau Fluvalinate*  | I/A | 17.62 | 503 | 181 |
|     |                   |     |       |     | 208 |
| 113 | Fenarimol         | F   | 17.86 | 331 | 238 |
|     |                   |     |       |     | 313 |
| 114 | Etofenprox*       | I   | 17.88 | 394 | 107 |
|     |                   |     |       |     | 177 |
| 115 | Bifenthrin        | I   | 17.91 | 442 | 166 |
|     |                   |     |       |     | 181 |
| 116 | Famoxadone*       | F   | 18.84 | 392 | 93  |

\* pesticide authorized on tomatoes

‡A: acaricide; F: fungicide; H: herbicide; I/A: acaricide/insecticide; I: insecticide; S: synergist a.i. IGR: insect growth regulator; I/N: insecticide/nematocide.
